# Supplementary material for: Characteristics and outcomes of physical activity interventions for individuals with mild traumatic brain injury: a scoping review protocol
Source: PubMed Central journal article supplement — BMJ Open. 2019 Jun 19;9(6):e027240. doi: 10.1136/bmjopen-2018-027240 (PMC6589025; doi:10.1136/bmjopen-2018-027240), 2019-06-19
Supplement: bmjopen-2018-027240supp001.pdf [file bmjopen-2018-027240supp001.pdf]

## Supplementary file I

### Full search strategy for Medline database

1. exp brain injuries, traumatic/ or exp brain concussion/
2. (mild traumatic brain injur\* or concussi\* or postconcuss\* or post-concuss\* or traumatic brain injur\* or TBI or mTBI or Closed head injur\*).ab,kf,kw,ti.
3. exp Exercise Therapy/
4. exp Physical Fitness/
5. exp Exercise/
6. exp Motor Activity/
7. (Physical activit\* or Motor activit\* or Exercise\* or Physical fitness or Exercise therap\*).ab,kf,kw,ti.
8. 1 or 2
9. 3 or 4 or 5 or 6 or 7
10. 8 and 9
11. limit 10 to (humans and yr="1990 -Current" and (english or french))
